# Supplementary material for: Reverse thermo-responsive hydrogels prepared from Pluronic F127 and gelatin composite materials
Source: Royal Society of Chemistry journal article supplement (doi:10.1039/c7ra01118k), 2017-01-01
Supplement: c7ra01118k1.pdf [file c7ra01118k1.pdf]

# Reverse Thermo-responsive Hydrogels Prepared from Pluronic F127 and Gelatin Composite Materials

Mei-Yu Yeh,<sup>ab</sup> Jiong-Yao Zhao,<sup>a</sup> Yi-Ru Hsieh,<sup>c</sup> Jhong-Hua Lin,<sup>c</sup> Fang-Yi Chen,<sup>c</sup>  
Rajan Deepan Chakravarthy,<sup>c</sup> Pei-Chun Chung,<sup>b</sup> Hsin-Chieh Lin,<sup>\*c</sup> and Shih-Chieh  
Hung<sup>\*bd</sup>

<sup>a</sup>Graduate Institute of Biomedical Sciences, China Medical University, Taichung 40402,  
Taiwan

<sup>b</sup>Integrative Stem Cell Center, China Medical University Hospital, Taichung 40447, Taiwan

<sup>c</sup>Department of Materials Science and Engineering, National Chiao Tung University, Hsinchu  
30010, Taiwan

<sup>d</sup>Institute of New Drug Development, China Medical University, Taichung 40402, Taiwan

## Contents

|                                                                       |    |
|-----------------------------------------------------------------------|----|
| 1. <b>Fig. S1 and S2.</b> Optical images                              | S2 |
| 2. <b>Fig. S3.</b> Frequency sweeps of F127                           | S2 |
| 3. <b>Table S1.</b> Physical properties of composite hydrogels        | S3 |
| 4. <b>Fig. S4.</b> Time-responsive rheological tests                  | S3 |
| 5. <b>Fig. S5.</b> The survival data of the hMSCs soaked in materials | S4 |
| 6. <b>Fig. S6.</b> SEM micrographs                                    | S4 |
| 7. <b>Fig. S7.</b> The XRD patterns of materials                      | S4 |
| 8. <b>Fig. S8.</b> Temperature-dependent spectra                      | S5 |
| 9. <b>Fig. S9.</b> Vial inversion tests                               | S5 |

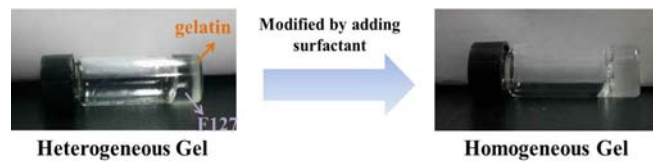

**Fig. S1.** Optical images of before (left) and after (right) adding SCMC in F127-gelatin at 37 °C.

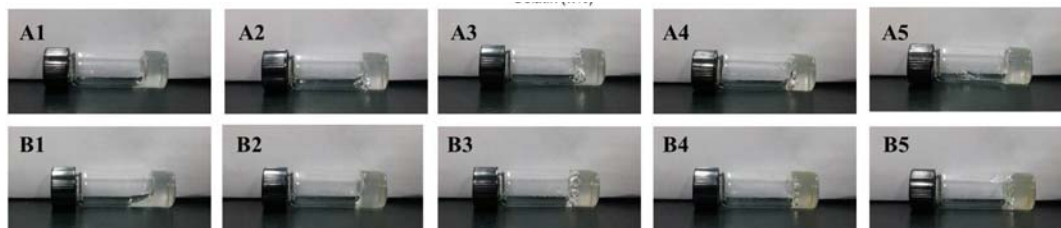

**Fig. S2.** Optical images of **A1-A5** and **B1-B5** at 37 °C.

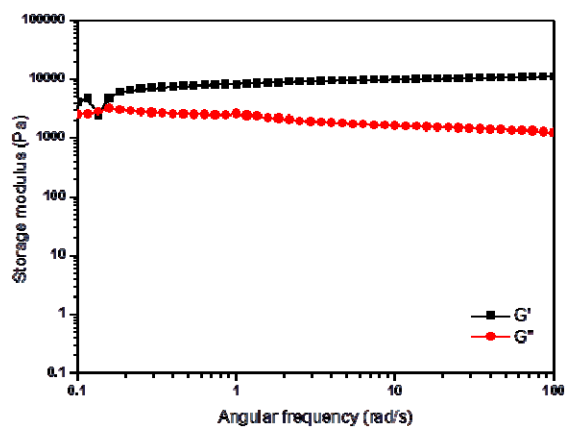

**Fig. S3.** Frequency sweeps of F127 (16 wt%) at 37°C.

**Table S1.** Physical properties of the composite hydrogels of **A1-A5** and **B1-B5** at 37 °C.

| Sample    | Appearance <sup>a</sup> | T <sub>sol-gel</sub> (°C) | T <sub>gel-sol</sub> (°C) | G' & G'' (Pa) <sup>b</sup>                  |
|-----------|-------------------------|---------------------------|---------------------------|---------------------------------------------|
| <b>A1</b> | TG                      | 29                        | 56                        | 3.24x10 <sup>3</sup> ; 1.31x10 <sup>3</sup> |
| <b>A2</b> | TG                      | 28                        | 61                        | 4.76x10 <sup>3</sup> ; 1.45x10 <sup>3</sup> |
| <b>A3</b> | TG                      | 28                        | 63                        | 6.45x10 <sup>3</sup> ; 1.37x10 <sup>3</sup> |
| <b>A4</b> | TG                      | 22                        | 65                        | 6.56x10 <sup>3</sup> ; 1.34x10 <sup>3</sup> |
| <b>A5</b> | TG                      | 22                        | 75                        | 6.68x10 <sup>3</sup> ; 1.30x10 <sup>3</sup> |
| <b>B1</b> | TG                      | 34                        | 48                        | 9.49x10 <sup>2</sup> ; 3.31x10 <sup>2</sup> |
| <b>B2</b> | TG                      | 31                        | 52                        | 1.48x10 <sup>3</sup> ; 5.09x10 <sup>2</sup> |
| <b>B3</b> | TG                      | 30                        | 59                        | 3.42x10 <sup>3</sup> ; 9.71x10 <sup>2</sup> |
| <b>B4</b> | TG                      | 22                        | 66                        | 3.69x10 <sup>3</sup> ; 1.13x10 <sup>3</sup> |
| <b>B5</b> | TG                      | 20                        | 77                        | 2.63x10 <sup>3</sup> ; 8.54x10 <sup>2</sup> |

<sup>a</sup> TG: transparent gel. <sup>b</sup> G': storage modulus; G'': loss modulus.

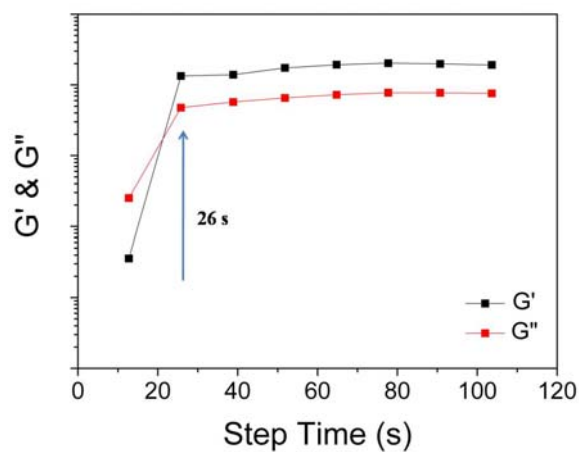

**Fig. S4.** Time-responsive storage (G') and loss (G'') modulus changes of F127-gelatin hydrogel.

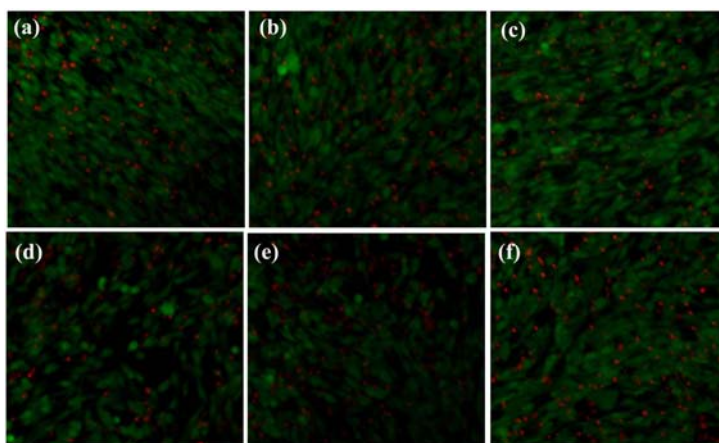

**Fig. S5.** The survival data of the hMSCs soaked in **A1-A3** and **B1-B3** for 2 days; live cells with calcein AM (green) and of dead cells with EthD-1 (red).

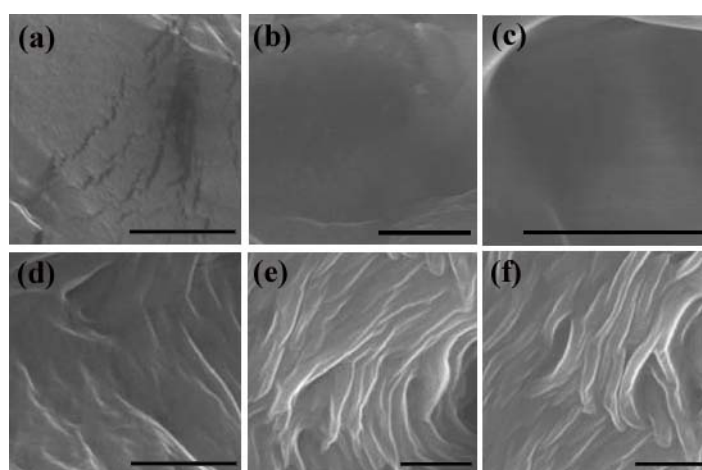

**Fig. S6.** SEM micrographs of vertical cross-sections of the composite hydrogels of **B1-B3**. (a-c) at 25 °C; (d-f) at 37 °C. (Scale bar: 1  $\mu$ m)

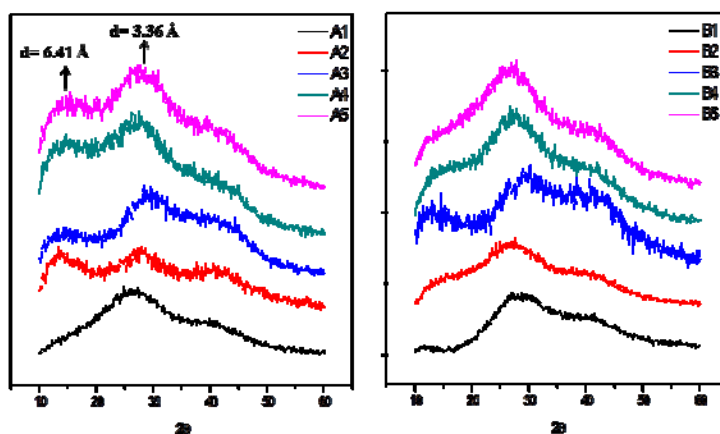

**Fig. S7.** The XRD patterns of **A1-A5** and **B1-B5** in water.

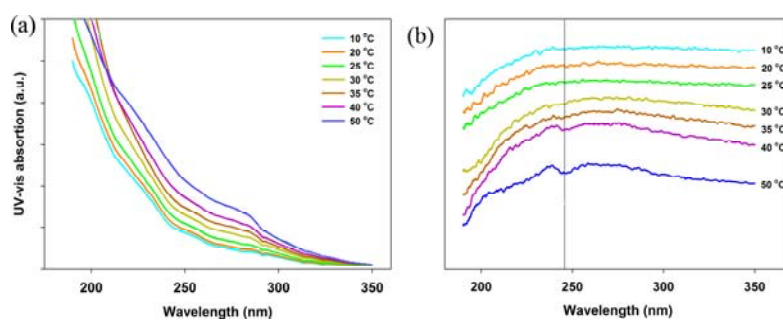

**Fig. S8.** Temperature-dependent (a) UV-vis absorption and (b) CD spectra of **B1**.

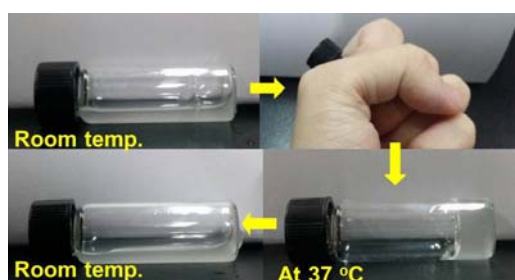

**Fig. S9.** Vial inversion tests provide visual evidence that the **B1** solution formed a hydrogel when the temperature was higher than the sol–gel transition temperature and formed a solution when the temperature back to the room temperature.
